# Supplementary material
Source: MDPI journal article supplement (https://www.mdpi.com/2571-8789/6/3/68)
Supplement: s1 [file s1]

Table S1. The main physical characteristics of studied soils.

| Soil ID | Horizon | Depth  | Soil texture | Soil color | Soil name          |
|---------|---------|--------|--------------|------------|--------------------|
| Y1      | Ah      | 0-6    | Sandy Loam   | 2.5YR 5/2  | Fallow Plaggic     |
|         | Abhp    | 6-30   | Sandy Loam   | 2.5YR 6/2  | Anthrosol (arenic) |
|         | Oi      | 0-4    | -            | -          |                    |
| Y3      | Ah      | 4-15   | Sandy Loam   | 2.5YR 5/2  | Calcic             |
|         | B       | 15-34  | Sandy Loam   | 7.5YR 8/3  | Cryosol            |
|         | Bt      | 34-54  | Sandy Loam   | 7.5YR 6/3  | (arenic)           |
|         | B/C     | 54-70  | Loamy Sand   | 7.5YR 5/3  |                    |
| Y5      | Ah      | 0-15   | Sandy Loam   | 2.5YR 5/2  | Calcic             |
|         | Btg     | 15-70  | Sandy Loam   | 2.5YR 5/1  | Cryosol (stagnic)  |
|         |         |        |              |            |                    |
| Y6      | Ahd1    | 0-6    | Sandy Loam   | 2.5YR 5/2  | Plaggic            |
|         | Ahd2    | 6-10   | Sandy Loam   | 2.5YR 6/2  | Anthrosol          |
|         | Bt      | 10-40  | Sandy Loam   | 2.5YR 6/3  | (arenic)           |
| Y7      | Ahp     | 0-24   | Sandy Loam   | 2.5YR 4/1  | Plaggic            |
|         | Bg      | 24-58  | Loamy Sand   | 2.5YR 6/1  | Anthrosol (arenic) |
|         |         |        |              |            |                    |
| Y9      | Oi      | 0-5    | -            | -          |                    |
|         | Ah      | 5-13   | Sandy Loam   | 2.5YR 5/2  | Calcic             |
|         | Bt      | 13-40  | Sandy Loam   | 7.5YR 8/3  | Cryosol (arenic)   |
|         | B/C     | 40-55  | Loamy Sand   | 7.5YR 5/3  |                    |
| Y10     | Ahp     | 0-26   | Sandy Loam   | 2.5YR 4/1  | Plaggic            |
|         | A/Bp    | 26-55  | Sandy Loam   | 2.5YR 5/2  | Anthrosol          |
|         | Bt      | 55-70  | Loamy Sand   | 7.5YR 5/3  | (arenic)           |
| Y11     | Ah      | 0-6    | Sandy Loam   | 2.5YR 5/2  |                    |
|         | Bt1     | 6-47   | Sandy Loam   | 7.5YR 8/3  | Calcic             |
|         | Bt2     | 47-89  | Loamy Sand   | 7.5YR 6/3  | Cryosol (arenic)   |
|         | B/C     | 89-100 | Loamy Sand   | 7.5YR 4/3  |                    |
| Y12     | Ahpz    | 0-15   | Sandy Loam   | 2.5YR 3/1  | Plaggic            |
|         | Btz1    | 15-45  | Sandy Loam   | 7.5YR 6/3  | Anthrosol          |
|         | Btz2    | 45-70  | Loamy Sand   | 2.5YR 5/2  | (salic)            |
|         |         |        |              |            |                    |
| Y13     | Ahp     | 0-25   | Sandy Loam   | 2.5YR 5/1  | Plaggic            |
|         | Bt      | 25-40  | Sandy Loam   | 2.5YR 6/4  | Anthrosol          |
|         | B/C     | 40-64  | Loamy Sand   | 2.5YR 5/4  | (arenic)           |
